# Supplementary material for: The preparation of MnFe2O4 decorated flexible graphene wrapped with PANI and its electrochemical performances for hybrid supercapacitors
Source: Royal Society of Chemistry journal article supplement (doi:10.1039/c3ra47681b), 2014-01-01
Supplement: c3ra47681b1.pdf [file c3ra47681b1.pdf]

## Supporting Information

### **Preparation of $\text{MnFe}_2\text{O}_4$ Decorated Flexible Graphene Wrapped with PANI and its Electrochemical Performances for Hybrid Supercapacitors**

Kalimuthu Vijaya Sankar, Ramakrishnan Kalai Selvan\*

Solid State Ionics and Energy Devices Laboratory, Department of Physics, Bharathiar  
University, Coimbatore – 641 046, Tamil Nadu, India.

#### *Corresponding Authors Information:*

\*E-mail address: [selvankram@buc.edu.in](mailto:selvankram@buc.edu.in) (R.K.Selvan)

### Charge Balancing between (AC) positive and (CMGP) negative electrodes:

The charge balancing between the electrodes are important for hybrid supercapacitor. It can be expressed as <sup>1,2</sup>

$$q^+ = q^- \quad (1)$$

Further, the charge stored in the positive and negative electrodes can be expressed as

$$q^+ = C_+ \times \Delta V_+ \times m_+ \quad (2)$$

$$q^- = C_- \times \Delta V_- \times m_- \quad (3)$$

For Positive electrode

$$q^+ = 236.5 \times 0.4 \times 1 \times 10^{-3} \quad (4)$$

$$q^+ = 151 \times 10^{-3} C \quad (5)$$

For negative electrode

$$q^- = 188 \times 0.8 \times 1 \times 10^{-3} \quad (6)$$

$$q^- = 150.4 \times 10^{-3} C \quad (7)$$

It reveals that the charge stored in the positive electrode is almost same as negative electrode ( $q^+ \approx q^-$ ).

In addition, the mass balancing between positive and negative electrodes can be expressed as

$$\frac{m_+}{m_-} = \frac{C_- \times \Delta V_-}{C_+ \times \Delta V_+} \quad (8)$$

$$m_+ = \frac{188 \times 0.8}{236.5 \times 0.4} \times 1 \times 10^{-3} \quad (9)$$

$$m_+ = \frac{150.4}{94.6} \times 1 \times 10^{-3} \quad (10)$$

$$m_+ = 1.58 \times 10^{-3} \quad (11)$$

Hence, the optimized mass ratio between AC and CMGP is approximately 1.6.

## Equations

(i). The specific capacitance of the electrode is calculated using the following equation as

$$C_p = \frac{\int i(V)dV}{m \times \Delta V \times s}$$

Where,  $C_p$  is specific capacitance  $F g^{-1}$ ,  $i(V)$  is CV current (mA),  $m$  is mass of active material,  $\Delta V$  is potential window (V), and  $s$  is scan rate.

(ii). Area occupied hydrated ( $S$ ) ions in the electrode can be calculated using

$$S = \frac{C_p \times N \times \Delta V \times \sigma}{F}$$

Where,  $N$  is Avogadro's number,  $\sigma$  is cross-sectional area of hydrated ions, and  $F$  is Faraday constant.

(iii). The specific capacitance is calculated from charge-discharge analysis is

$$C_s = \frac{i \times \Delta t}{m \times \Delta V}$$

Where,  $C_s$  is specific capacitance ( $F g^{-1}$ ),  $i$  is current density ( $mA cm^{-2}$ ),  $\Delta t$  is the discharge time (sec),  $m$  is mass of active material (mg), and  $\Delta V$  is potential window (V).

(iv). The active site in the electrode material can be calculated using the following equation as

$$z = \frac{C_s \times n \times \Delta V \times M}{F}$$

Where,  $C_s$  is specific capacitance  $F g^{-1}$ ,  $n$  is number of transfer of electrons,  $\Delta V$  is potential window (V),  $M$  is molecular weight, and  $F$  is Faraday constant.

(v). The energy density and power density of the hybrid supercapacitor is calculated using the following equation

$$E_{cell} = \frac{1}{2} C_{cell} \Delta V^2$$

$$P_{cell} = \frac{E_{cell}}{\Delta t}$$

Where,  $E_{cell}$  is energy density of the cell ( $Wh kg^{-1}$ ),  $C_{cell}$  is specific capacitance ( $F g^{-1}$ ),  $P_{cell}$  is power density ( $W kg^{-1}$ ).

## Calculation of theoretical specific capacitance

### MnFe<sub>2</sub>O<sub>4</sub>:

Let's consider a single electron is transfer in the MnFe<sub>2</sub>O<sub>4</sub> during electrochemical reaction means the theoretical specific capacitance can be found using following manner

$$C_t = \frac{n \times F}{\Delta V \times m}$$
$$= (1 \times 96487) / (0.8 \times 230.6262)$$
$$= 522 \text{ F g}^{-1}$$

Hence, the theoretical specific capacitance for MnFe<sub>2</sub>O<sub>4</sub> is 522 F g<sup>-1</sup>. The reported graphene theoretical specific capacitance is 550 F g<sup>-1</sup> [1]. Hence, the theoretical specific capacitance for MG-20 as

### For MnFe<sub>2</sub>O<sub>4</sub> (80%)

$$100 \% \text{ of Mn} = 522$$

$$80\% \text{ of Mn} = (522 \times 80) / 100 = 418 \text{ F/g}$$

### For graphene (20%)

$$100 \% \text{ of graphene} = 550$$

$$20\% \text{ of graphene} = (550 \times 20) / 100 = 110 \text{ F/g}$$

**Hence, MG-20 has theoretical specific capacitance is 528 F/g**

Further, the theoretical specific capacitance for PANI is 2000 F/g [2].

Hence, the theoretical specific capacitance for MGP-5 as

### For MG-20 (95%)

$$100 \% \text{ of MG-20} = 528$$

$$95\% \text{ of MG-20} = (528 \times 95) / 100 = 502 \text{ F/g}$$

### For PANI (5%)

$$100 \% \text{ of PANI} = 2000$$

$$5\% \text{ of PANI} = (2000 \times 5) / 100 = 100 \text{ F/g}$$

**Hence, MGP-5 has theoretical specific capacitance is 601 F/g**

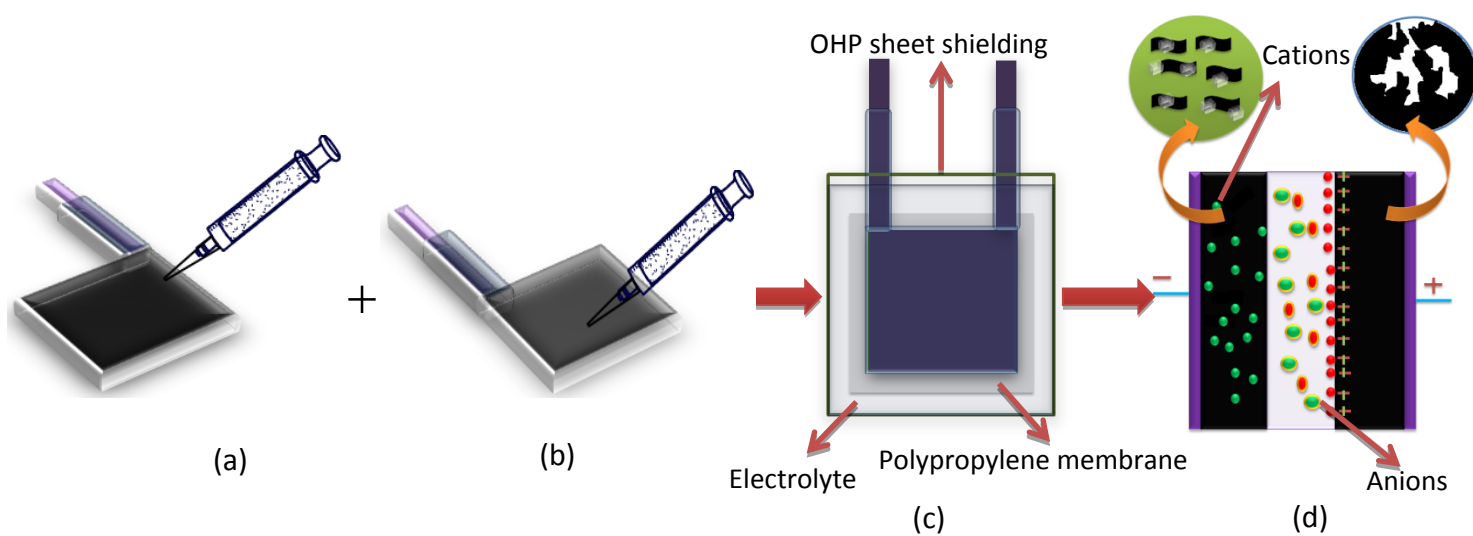

**Fig. S1** Schematic representation for the (a, b) preparation of MGP (Negative) and activated carbon (Positive) electrodes, (c) is the fabricated hybrid supercapacitor and (d) the charge storage mechanism in hybrid supercapacitor.

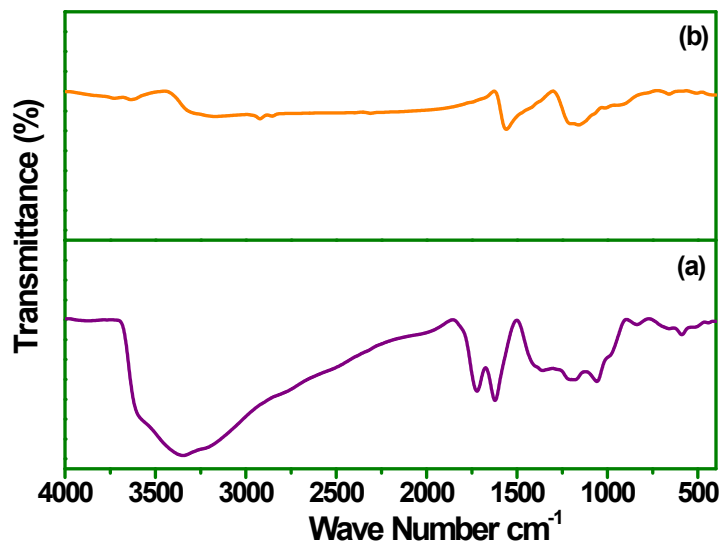

**Fig. S2** FT-IR spectra of (a) graphene oxide and (b) graphene.

The FT-IR (Figure S2(a)) spectrum of graphene oxide reveals that the presence of functional groups like carbonyl group ( $1058\text{ cm}^{-1}$ ), epoxy ( $1203\text{ cm}^{-1}$ ), hydroxyl ( $1358\text{ cm}^{-1}$ ), and carboxyl ( $1722\text{ cm}^{-1}$ ). Subsequently, the C-C band of graphitic carbon and adsorbed water peaks are observed at  $1622$  and  $3346\text{ cm}^{-1}$ . On the other hand, the disappearance and reduction of intensity of the peaks of above mentioned wave number is represents (Figure S2(b)) the deoxygenation or reduction of graphene oxide to graphene. Hence, the NaOH is playing as a reducing agent for producing graphene via green route method.

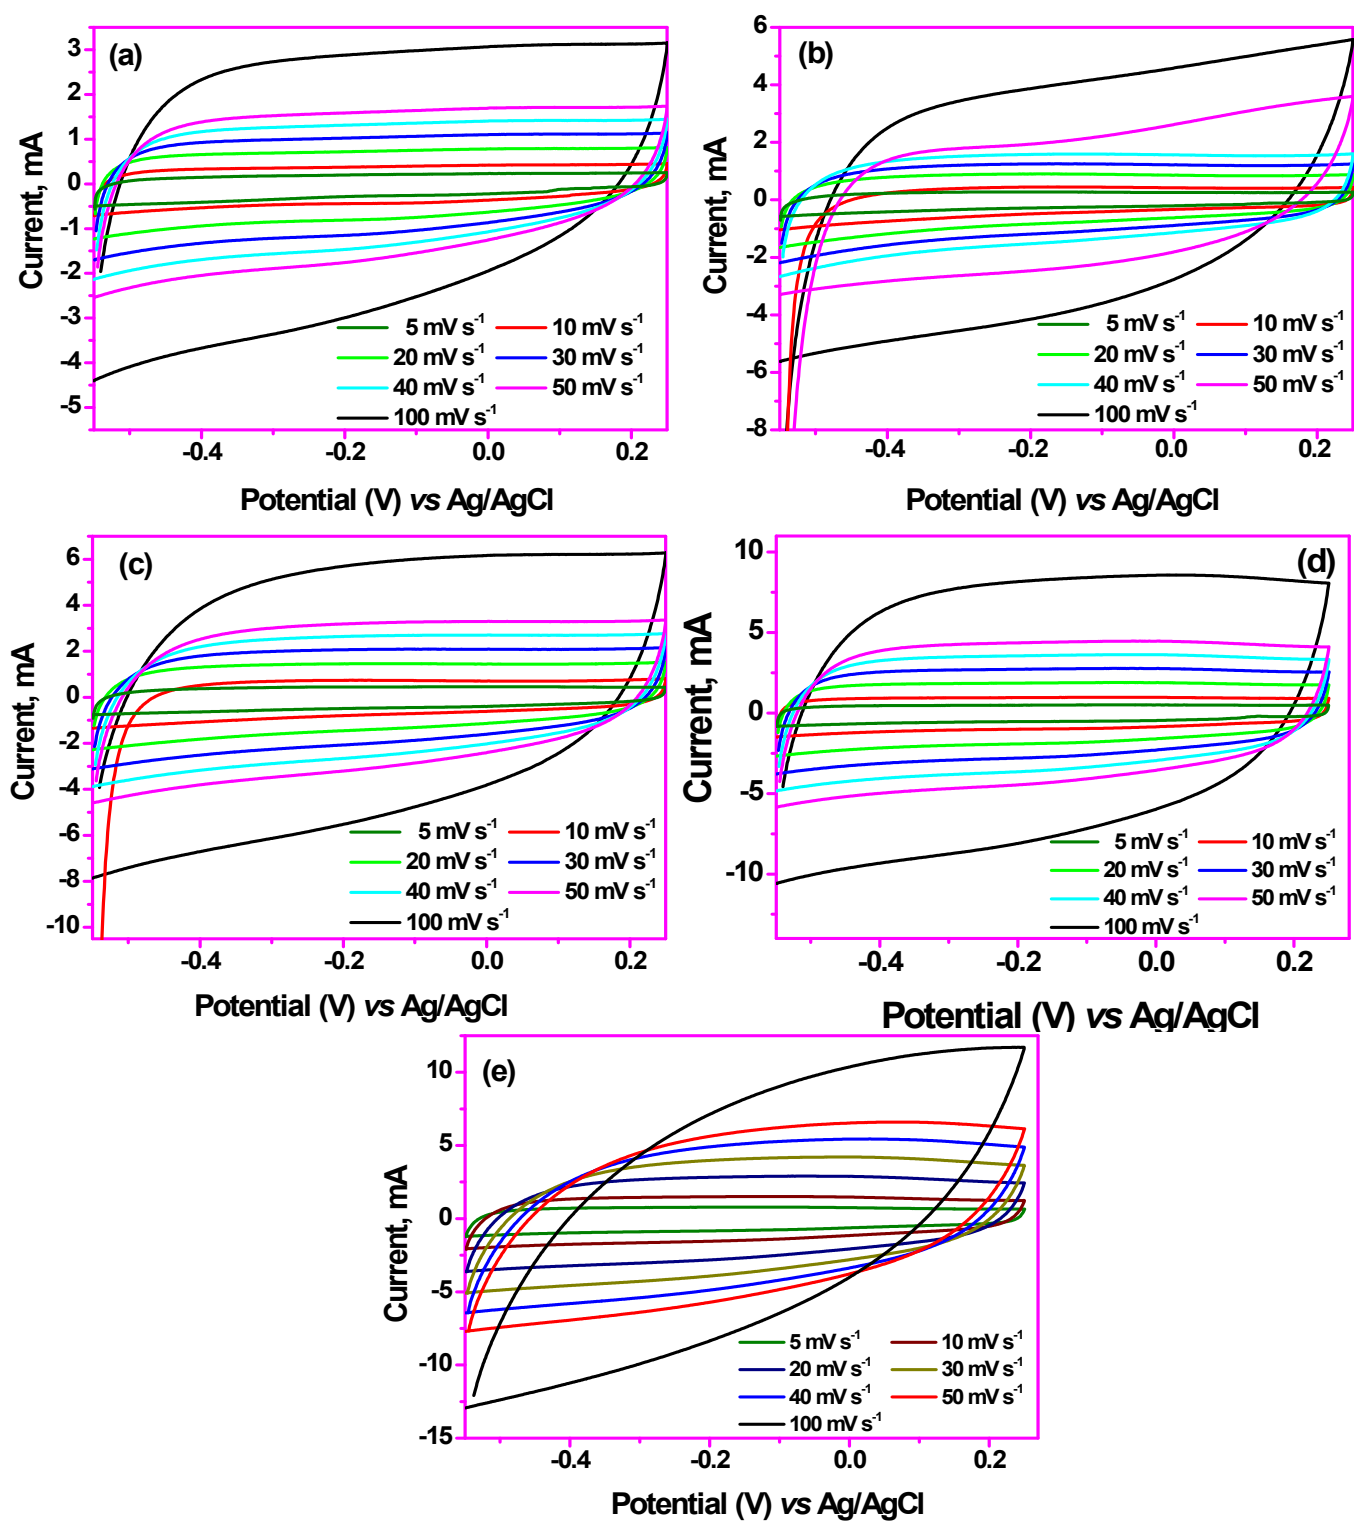

**Fig. S3** CV curves of M-3, MG-5, MG-10, MG-20, and MG-30 at different scan rates such as 5-100 mV s<sup>-1</sup>.

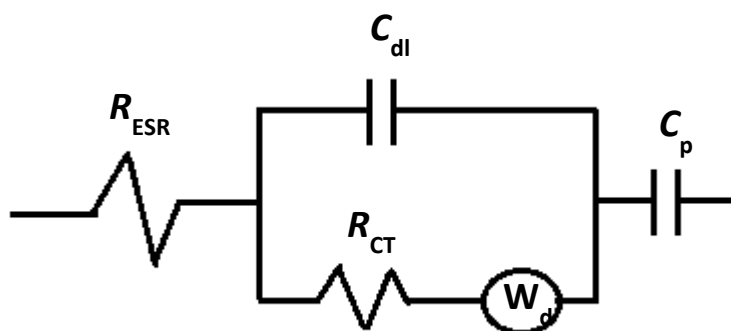

**Fig. S4** Equivalent circuit for fitting impedance plot.

In this equivalent circuit,  $R_{ESR}$ ,  $R_{ct}$ ,  $C_{dl}$ ,  $W_d$  and  $C_p$  are represents the equivalent serious resistance, charge transfer resistance, double layer capacitance, Warburg factor and pseudocapacitance.



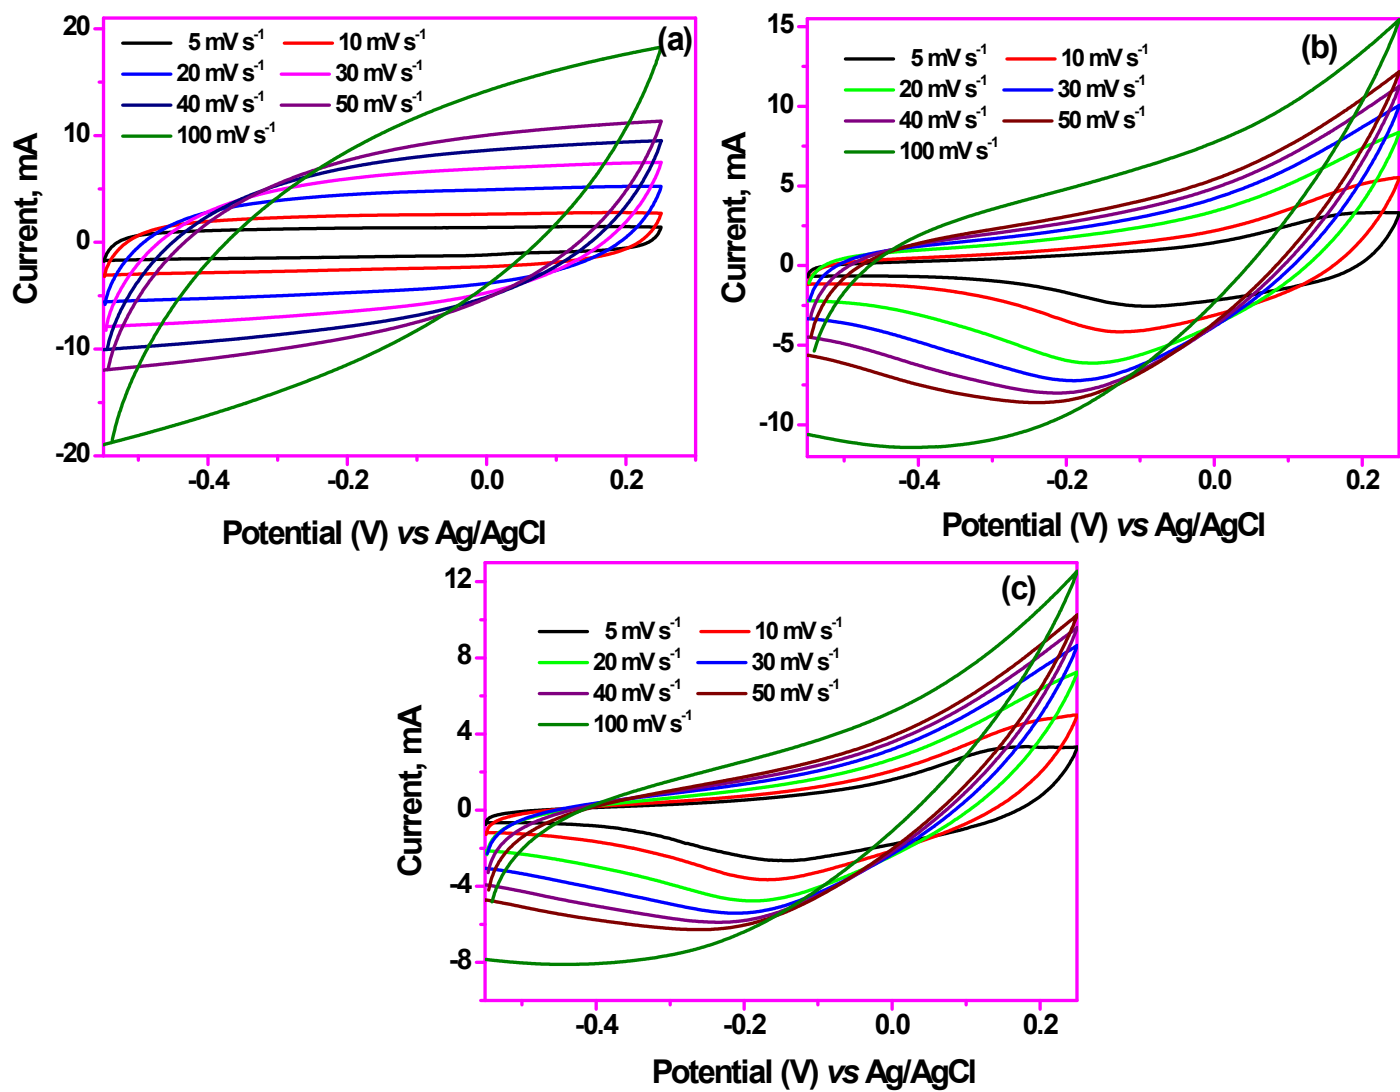

Fig. S5 CV curves of (a) MGP-5, (b) MGP-10 and (c) MGP-15 at different scan rates.

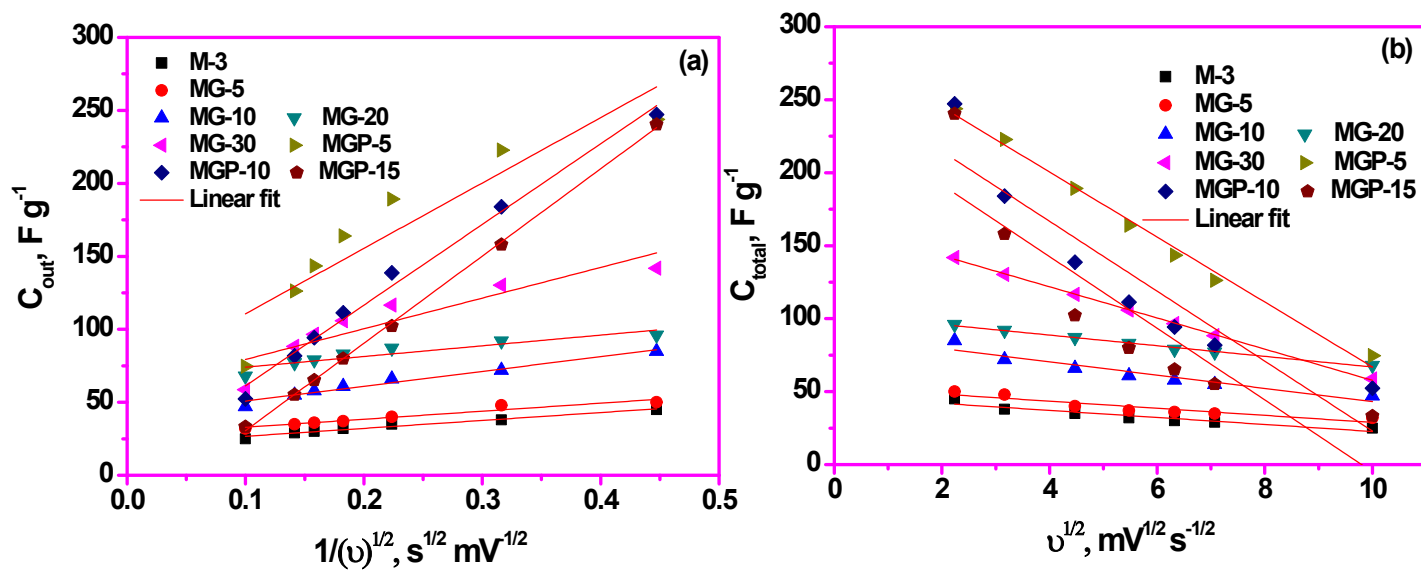

**Fig. S6** Trasatti plot of (a)  $C_{out}$  versus  $1/(v)^{1/2}$  and (b)  $C_{total}$  versus  $(v)^{1/2}$  for M-3, MG-5, MG-10, MG-20, MG-30, MGP-5, MGP-10 and MGP-15.

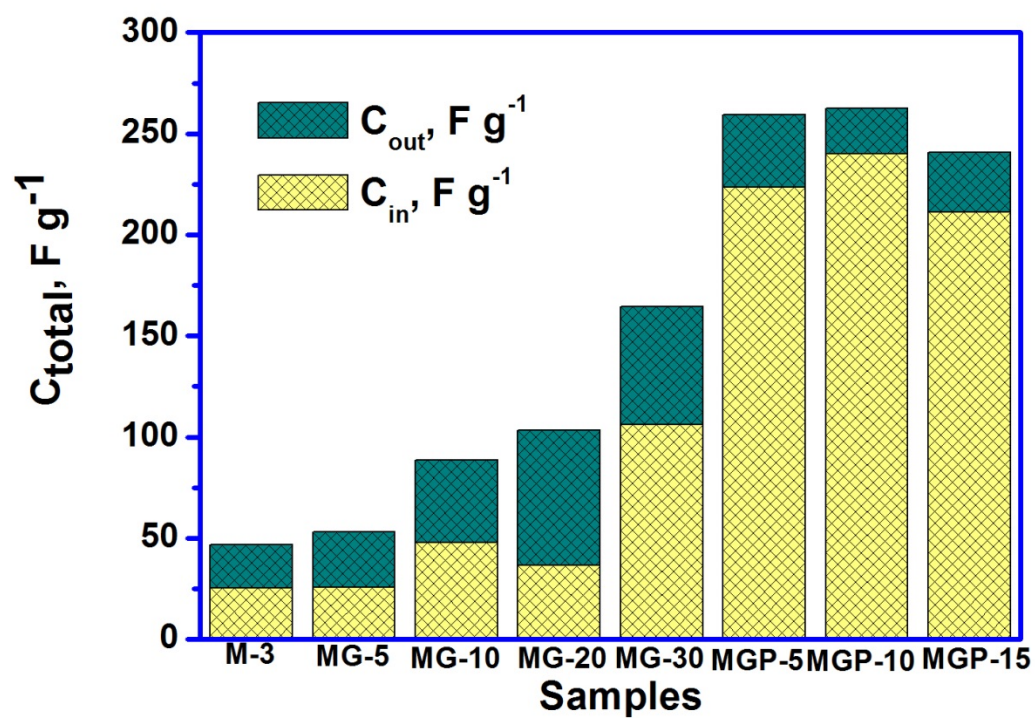

**Fig. S7** Comparison of the total specific capacitance exhibited by inner and outer surface of the electrodes of M-3, MG-5, MG-10, MG-20, MG-30, MGP-5, MGP-10 and MGP-15.

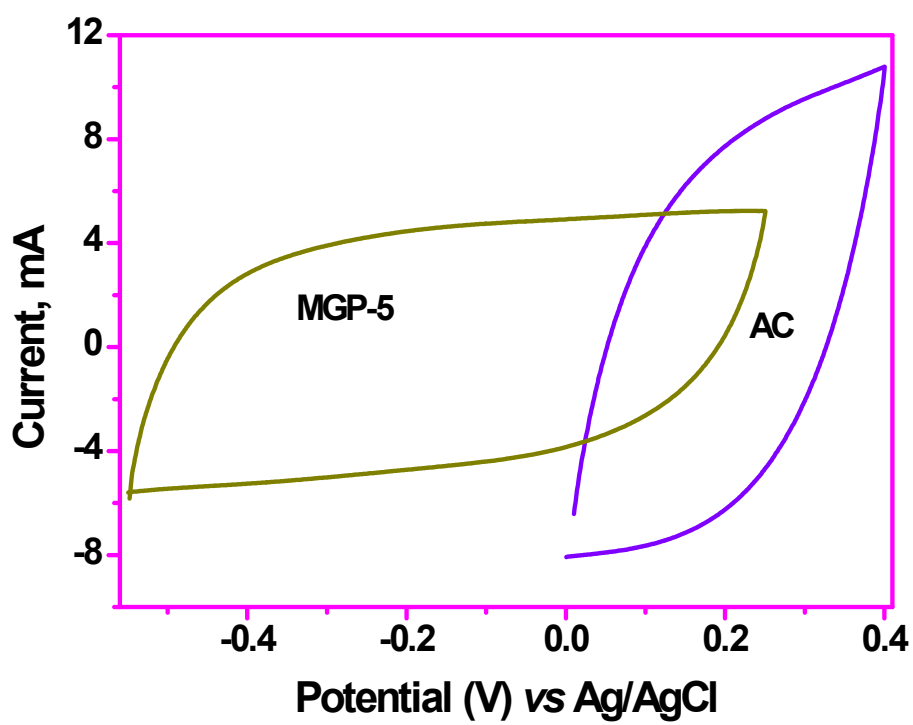

Fig. S8 CV curve of positive and negative electrodes at  $20 \text{ mV s}^{-1}$  in 1M NaCl electrolyte.

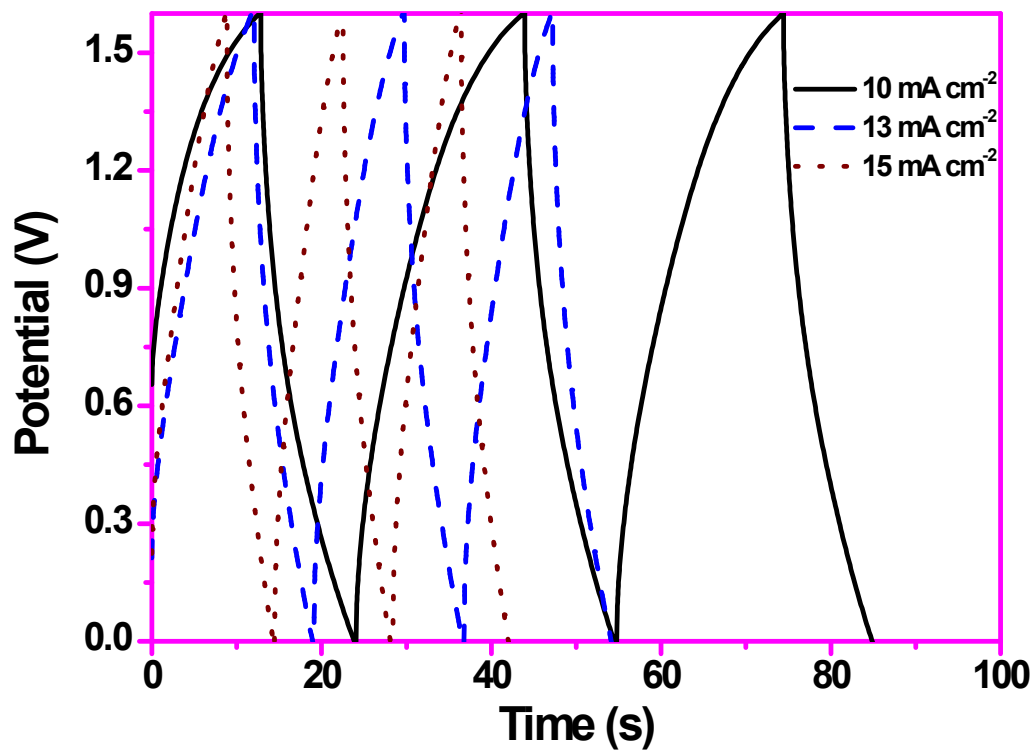

Fig. S9 GCDs curves of hybrid supercapacitor at different current densities.

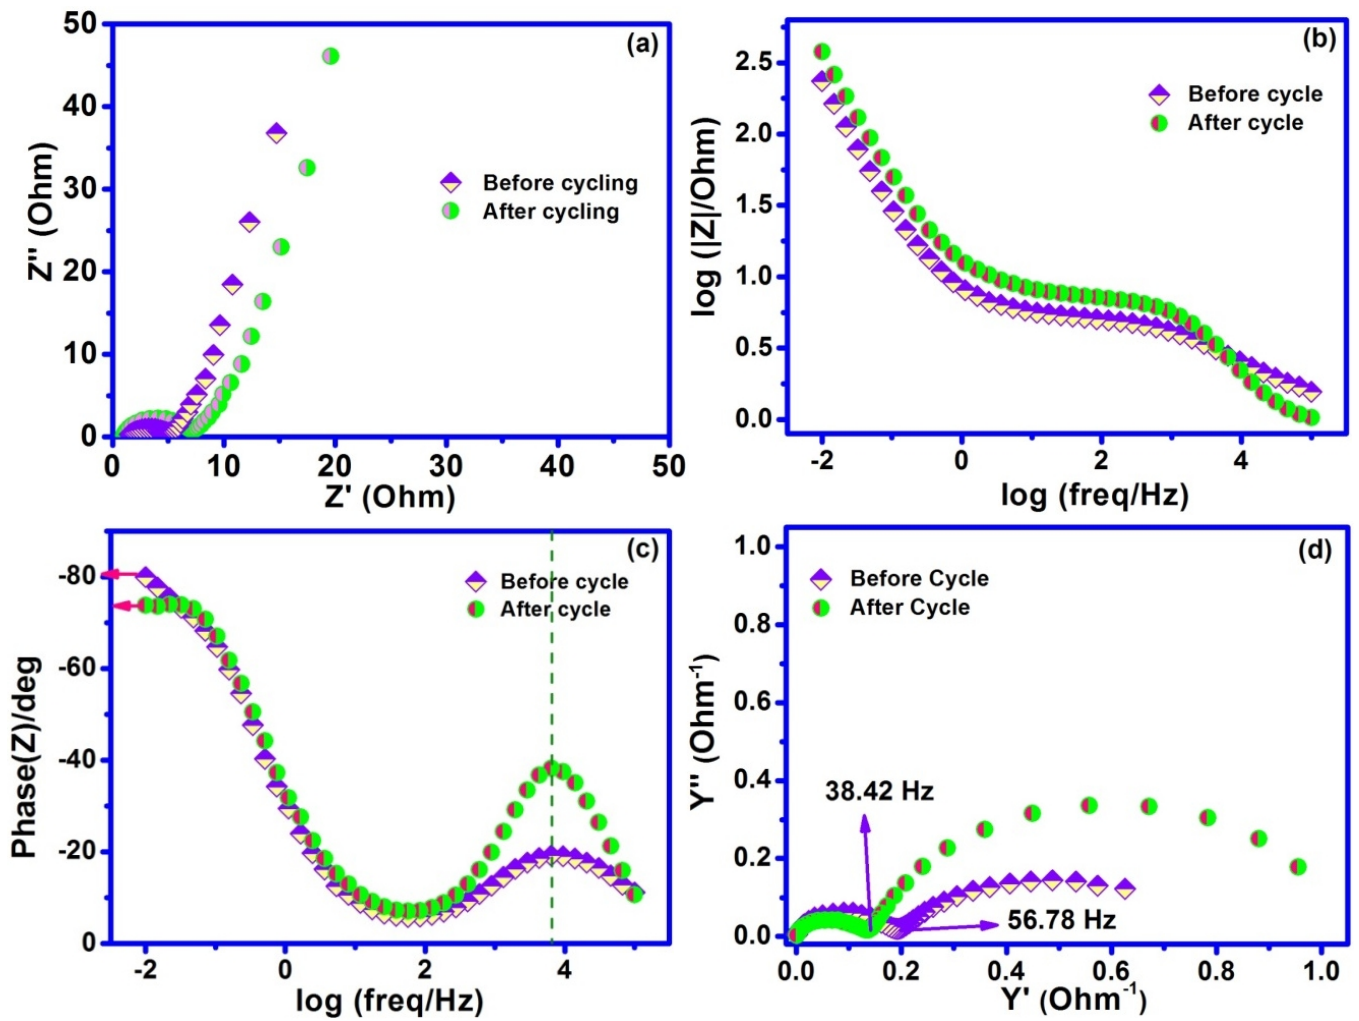

**Fig. S10** (a) Nyquist plot, (b, c) bode plot and (d) admittance plot of hybrid supercapacitor before and after cycling.

**Table 1.** Electrochemical impedance spectra fitted parameters

| Sample              | $C_{dl}$ (F)<br>$\times 10^{-6}$ | $W_d$<br>( $\text{Ohm S}^{-1/2}$ ) | $C_p$ (F) | Error ( $\chi/\sqrt{N}$ ) |
|---------------------|----------------------------------|------------------------------------|-----------|---------------------------|
| M-3                 | 23.84                            | 36.91                              | 0.022 87  | 0.05260                   |
| MG-5                | 27.17                            | 15.10                              | 0.056 12  | 0.05912                   |
| MG-10               | 12.83                            | 10.63                              | 0.041 84  | 0.05942                   |
| MG-20               | 15.42                            | 7.108                              | 0.028 07  | 0.06139                   |
| MG-30               | 36.41                            | 16.84                              | 0.107 30  | 0.05302                   |
| MGP-5               | 28.00                            | 5.063                              | 0.180 50  | 0.06552                   |
| MGP-10              | 26.20                            | 25.78                              | 0.086 59  | 0.08763                   |
| MGP-15              | 25.20                            | 27.82                              | 0.086 59  | 0.07356                   |
| Cell before cycling | 11.08                            | 11.64                              | 0.050 11  | 0.07615                   |
| Cell after cycling  | 9.236                            | 14.80                              | 0.044 92  | 0.09200                   |

## References

1. X. Li, H. Song, Y. Zhang, H. Wang, K. Du, H. Li, Y. Yuan and J. Huang, *Int. J. Electrochem. Sci.*, 2012, **7**, 5163 – 5171.
2. H. Li, J. Wang, Q. Chu, Z. Wang, F. Zhang and S. Wang, *J. Power Sources*, 2009, **190**, 578–586.
